# Supplementary material for: Double surfactant-directed controllable synthesis of Sb2S3crystals with comparable electrochemical performances
Source: Royal Society of Chemistry journal article supplement (doi:10.1039/c4ce00871e), 2014-05-29
Supplement: c4ce00871e1.pdf [file c4ce00871e1.pdf]

# Electronic Supplementary Information

## Double Surfactant-Directed Controllable Synthesis of $\text{Sb}_2\text{S}_3$ Crystals With Comparable Electrochemical Performances

Chunshuang Yan, Gang Chen,\* Dahong Chen, Jian Pei,\* Jingxue Sun, Haiming Xu, Yongqiang

Zhang and Zhuangzhuang Qiu

**Table S1.** Abbreviation of various products, the initial and cyclic capacity of smples.

|                                                     | Pg2-1 | Pg6-0 | Pg1-1 | Pg1-2 | Pg0-6 | Pg0-0 |
|-----------------------------------------------------|-------|-------|-------|-------|-------|-------|
| PVP/glucose(quality)                                | 2:1   | 6:0   | 1:1   | 1:2   | 0:6   | 0:0   |
| An initial capacity(mAh g <sup>-1</sup> )           | 914   | 629   | 933   | 813   | 570   | 430   |
| The capacity after 10 cycles (mAh g <sup>-1</sup> ) | 151   | 124   | 41    | 4     | 1     | 1     |

In this work, all of the products are named as Pgx-y for convenience. P and g denotes the abbreviation of PVP and glucose respectively. x-y denotes the mass ratio of PVP and glucose.

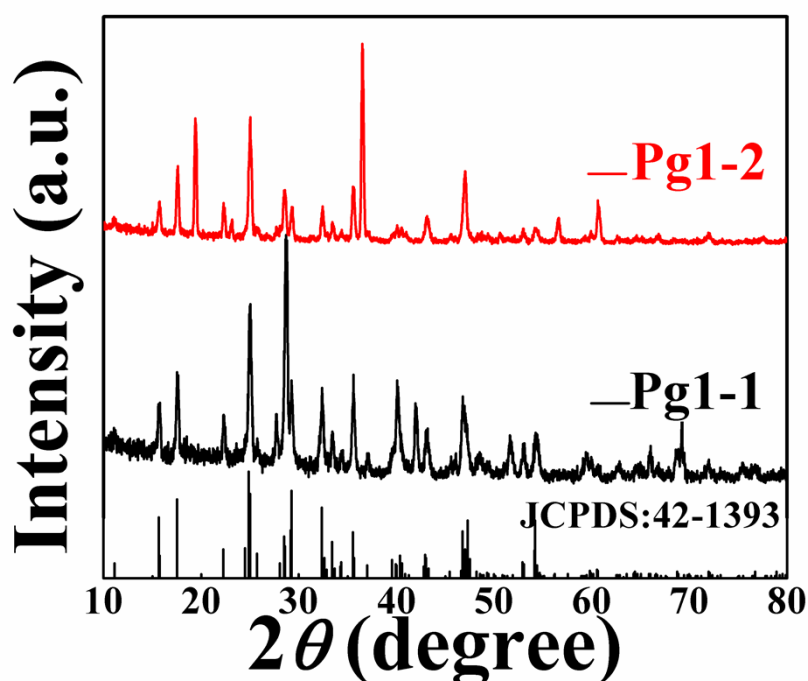

Fig. S1. XRD patterns of the samples obtained by a solvothermal reaction with different mass ratio of the double surfactant (PVP : glucose), (a, b) 1 : 2 and (c, d) 1 : 1.

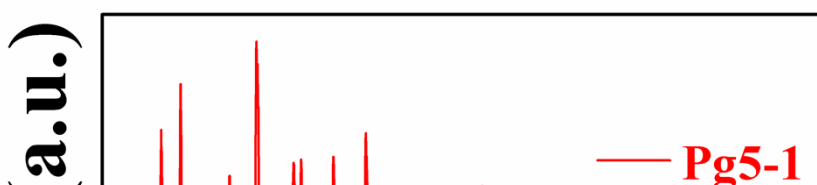

Fig. S2. XRD patterns of the samples obtained by a solvothermal reaction with different mass ratio of the double surfactant (PVP : glucose), (a, b) 5 : 1 and (c, d) 1 : 5.

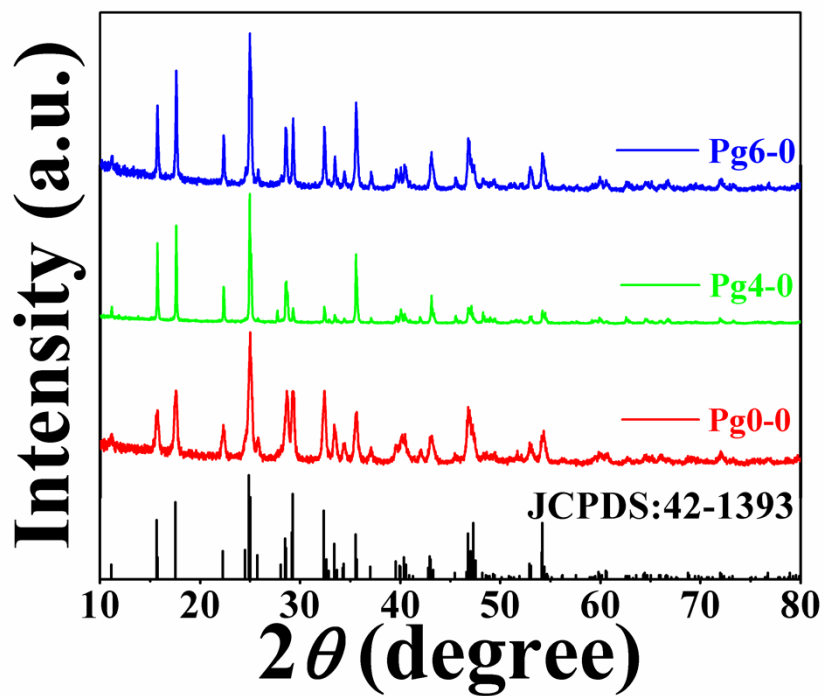

Fig. S3. XRD patterns of the samples obtained by a solvothermal reaction in a mixed solvent at 180 °C for 8 h for different concentrations of PVP. a) 0 g (Pg0-0); b) 0.4 g (Pg4-0); c) 0.6 g (Pg6-0).

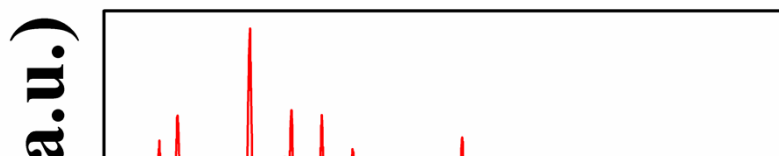

Fig. S4. XRD patterns of the samples obtained by a solvothermal reaction in a mixed solvent at 180 °C for 8 h for different concentrations of glucose. a) 0.3 g (Pg0-3); b) 0.6 g (Pg0-6).

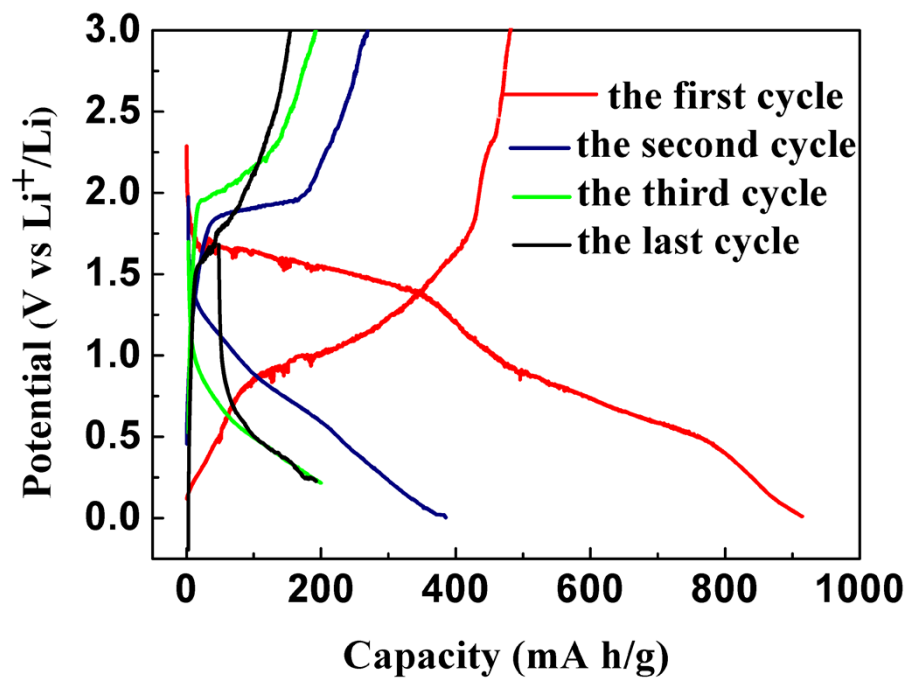

Fig S5. The charge-discharge curves of Pg2-1 for the second cycle and the further cycles.
